# Supplementary material for: Silicon Wafer CMP Slurry Using a Hydrolysis Reaction Accelerator with an Amine Functional Group Remarkably Enhances Polishing Rate
Source: MDPI journal article supplement (doi:10.3390/nano12213893), 2022-11-04
Supplement: s1 [file s1]

# Silicon Wafer CMP Slurry Using a Hydrolysis Reaction Accelerator with an Amine Functional Group Remarkably Enhances Polishing Rate

Jae-Young Bae<sup>1</sup>, Man-Hyup Han<sup>2</sup>, Seung-Jae Lee<sup>3</sup>, Eun-Seong Kim<sup>2</sup>, Kyungsik Lee<sup>3</sup>, Gon-sub Lee<sup>3</sup>, Jin-Hyung Park<sup>4</sup>, and Jea-Gun Park<sup>2,3\*</sup>

<sup>1</sup> Department of Energy Engineering, Hanyang University, Seoul 04763, Korea

<sup>2</sup> Department of Nanoscale Semiconductor Engineering, Hanyang University, Seoul 04763, Korea

<sup>3</sup> Department of Electronic Engineering, Hanyang University, Seoul 04763, Korea

<sup>4</sup> UB Materials Inc., Yongin 17162, Korea

\* Correspondence: parkjgl@hanyang.ac.kr

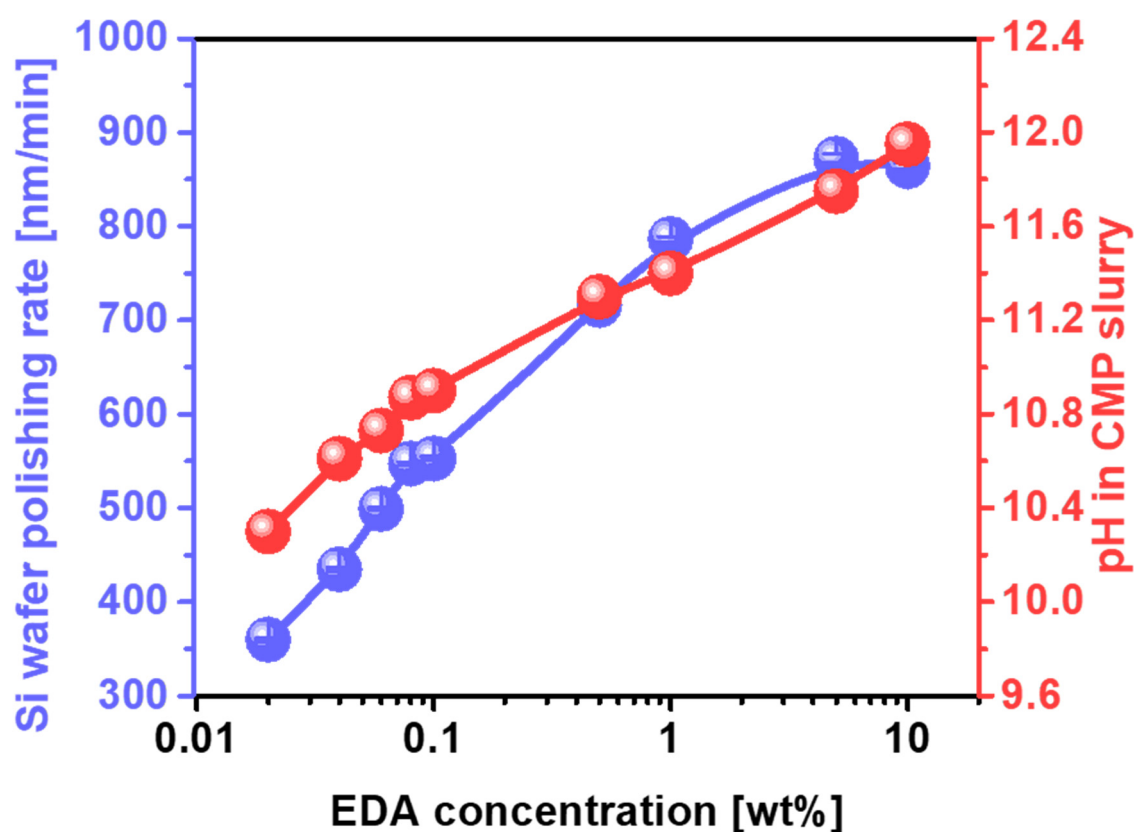

Figure S1. The dependency of Si wafer polishing rate and pH on EDA concentration.

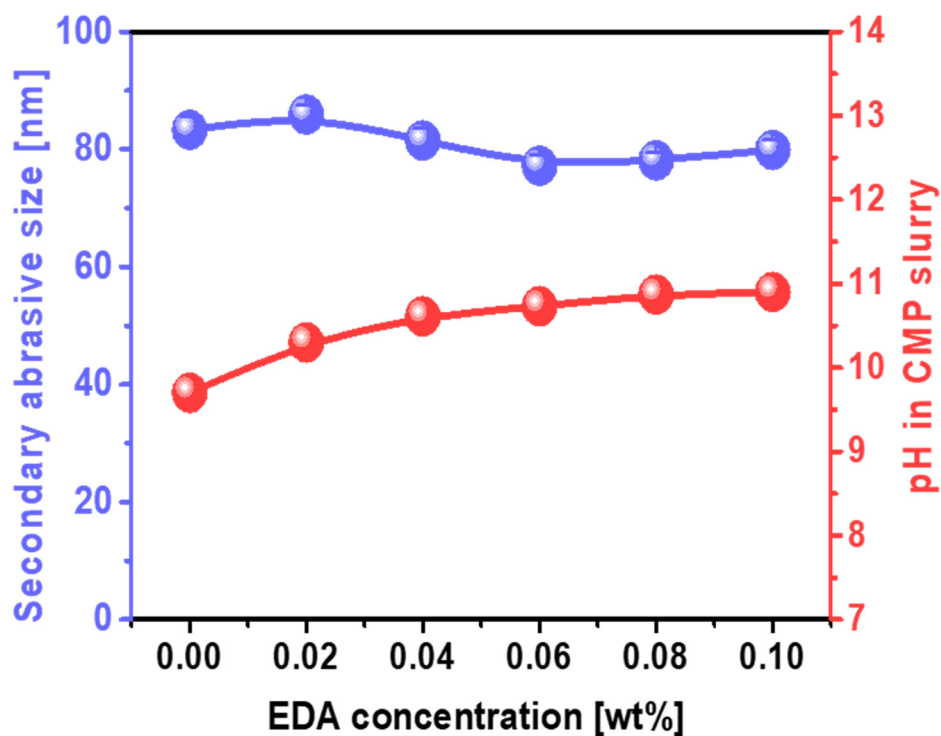

**Figure S2.** The secondary colloidal silica abrasives size and pH depending on EDA concentration in the Si wafer CMP slurry. The secondary colloidal silica abrasives size was independent of the EDA concentration. The pH of slurry slightly and root-squarely the EDA concentration.

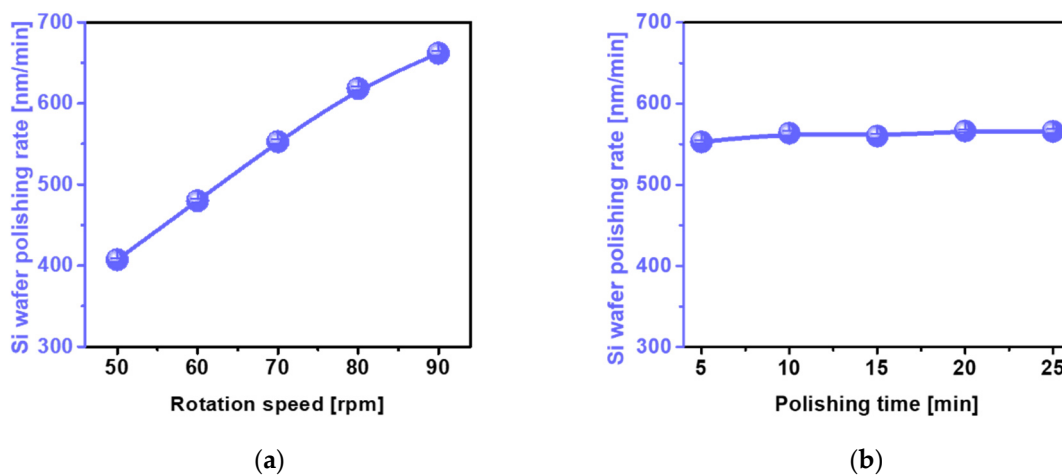

**Figure S3.** Dependencies of the Si wafer polishing rate on the head and table rotation speed and polishing time. (a) Effect of the rotation speed on the Si wafer polishing rate and (b) effect of the polishing time on the Si wafer polishing rate.

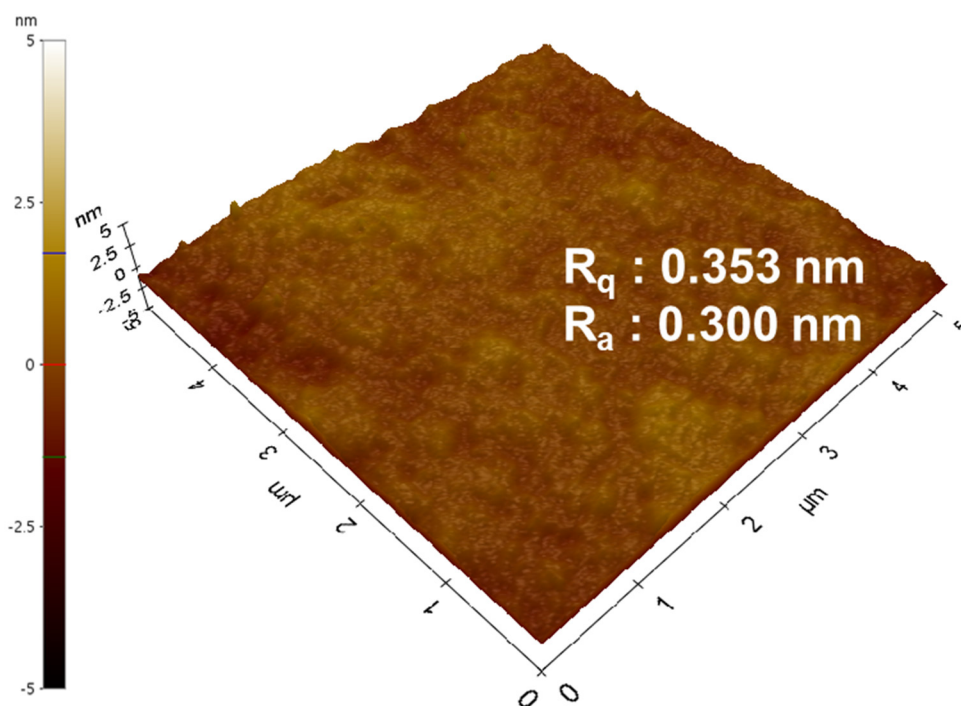

**Figure S4.** Surface roughness of the polished Si wafer after CMP using the slurry including 60-nm-diameter colloidal silica abrasives of 1 wt% and EDA of 0.10 wt%. The  $R_q$  (i.e., Root Mean Square Roughness) of the polished Si wafer was 0.353 nm by using AFM ( $5\mu\text{m} \times 5\mu\text{m}$  in scanning area).

**Table S1.** Si wafer polishing rate comparison for the Si wafer CMP slurry using NaOH, KOH, and commercial Si wafer CMP slurries.

| List                | Si wafer CMP Slurry Properties |                             |       |                      |                         |                     |
|---------------------|--------------------------------|-----------------------------|-------|----------------------|-------------------------|---------------------|
|                     | Abrasives                      | Accelerator                 | pH    | Conductivity [uS/cm] | Polishing-rate [nm/min] | Manufacturer        |
| Our work            | Silica @ 60 nm<br>1 wt%        | Ethylenediamine<br>0.10 wt% | 10.90 | 379.8                | $552.8 \pm 2.15$        | -                   |
| Slurry using NaOH   | Silica @ 60 nm<br>1 wt%        | NaOH<br>0.125 wt%           | 10.90 | 501.2                | $177.1 \pm 1.07$        | -                   |
| Slurry using KOH    | Silica @ 60 nm<br>1 wt%        | KOH<br>0.069 wt%            | 10.90 | 490.8                | $193.2 \pm 1.07$        | -                   |
| Commercial slurry A | Silica @ 70 nm<br>1 wt%        | Non-disclosed               | 10.29 | 1065.0               | $372.3 \pm 2.68$        | Fujimi Inc.         |
| Commercial slurry B | Silica @ 15 nm<br>1 wt%        | Non-disclosed               | 10.52 | 826.0                | $316.7 \pm 1.61$        | HANA Materials Inc. |

**Table S2.** Si wafer polishing rate comparison for the Si wafer or polysilicon CMP slurries via hydrolysis reaction with amine functional group. Note that a higher rotation speed, head pressure, and a harder pad leads to a higher Si wafer polishing rate. Our work presented a remarkably high Si wafer polishing rate at a relatively low rotation speed (i.e., 70 rpm), a low head pressure (i.e., 4 psi), and a softer pad (i.e., Suba 600).

| List            | Slurry Compositions                      |                                                    |          |                             | CMP Conditions          |                     |                      |                    |                     | Reference |
|-----------------|------------------------------------------|----------------------------------------------------|----------|-----------------------------|-------------------------|---------------------|----------------------|--------------------|---------------------|-----------|
|                 | Abrasives                                | Hydrolysis reaction accelerator                    | pH       | Dilution ratio [slurry:DIW] | Polishing rate [nm/min] | Head pressure [psi] | Rotation speed [rpm] | Flow rate [mL/min] | CMP pad             |           |
| Si wafer CMP    | colloidal silica (35 wt%)                | organic bases <sup>1</sup> as pH titrant (1.5 wt%) | 10.5-12  | 1:15                        | ~ 700                   | 58                  | 100                  | 50                 | non-disclosed       | [29]      |
| Si wafer CMP    | colloidal silica @ 30 nm (non-disclosed) | poly amine (Non-disclosed)                         | 9.5-11.3 | 1:15                        | 1450                    | 17.4                | 60                   | 300                | CP-P-32 (hard pad)  | [30]      |
| polysilicon CMP | colloidal silica @ 30 nm (1.3 wt%)       | tetramethylammonium hydroxide (0-0.8 wt%)          | 6.8-11.8 | -                           | 261.3                   | 4                   | 30                   | 210                | IC1000 (hard pad)   | [18]      |
| polysilicon CMP | colloidal silica @ 50 nm (10 wt%)        | arginine (0-2 wt%)                                 | 3-11     | -                           | ~ 450                   | 4                   | 75                   | 200                | IC1000 (hard pad)   | [27]      |
| polysilicon CMP | abrasive-free                            | guanidine carbonate (1 wt%)                        | 4-11     | -                           | 250                     | 4                   | 75                   | 200                | IC1000 (hard pad)   | [28]      |
| Si wafer CMP    | colloidal silica @ 60 nm (1 wt%)         | ethylenediamine (0-0.1 wt%)                        | 9.7-10.9 | -                           | 552.8                   | 5.7                 | 70                   | 100                | Suba 600 (soft pad) | Our work  |

<sup>1</sup> Organic bases; ethanolamine, diethanolamine, ethylenediamine, diethylenetriamine, triethylenetetramine, and aminoethylethanolamine

**Table S3.** Production price for hydrolysis reaction accelerator with amine functional group.

| List                 | Information              |                |                  |
|----------------------|--------------------------|----------------|------------------|
|                      | Chemical structure       | Chemical grade | Production price |
| Ethylenediamine      | $C_2H_4(NH_2)_2$         | for synthesis  | \$75.60 / L      |
| Diethylenetriamine   | $HN(CH_2CH_2NH_2)_2$     | for synthesis  | \$85.70 / L      |
| Triethylenetetramine | $(CH_2NHCH_2CH_2NH_2)_2$ | for synthesis  | \$117.00 / L     |
